# Supplementary material for: Hydrogenous materials using powder neutron diffraction: full structural determination of adsorbed water molecules in a zeolite
Source: Royal Society of Chemistry journal article supplement (doi:10.1039/b719464a), 2008-01-01
Supplement: b719464a.pdf [file b719464a.pdf]

## Electronic Supplementary Information

### 1. Constrained bond-length model Rietveld

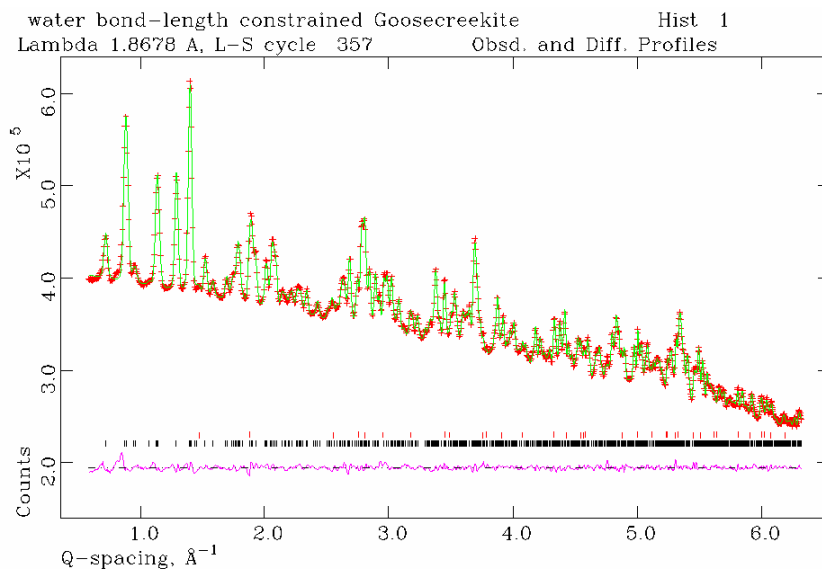

**Supplementary Figure 1** (Manuscript Figure 1) Final Rietveld refinement profile for goosecreekite for the bond length constrained model. The observed data are crosses, the calculated pattern a solid line, the tick marks show the allowed reflections (upper quartz, lower goosecreekite) and the lower solid line is the difference plot;  $R_{wp} = 6.6\%$ ,  $R_p = 5.0\%$  and  $R_{p**2} = 3.01\%$  for 1089 observations.

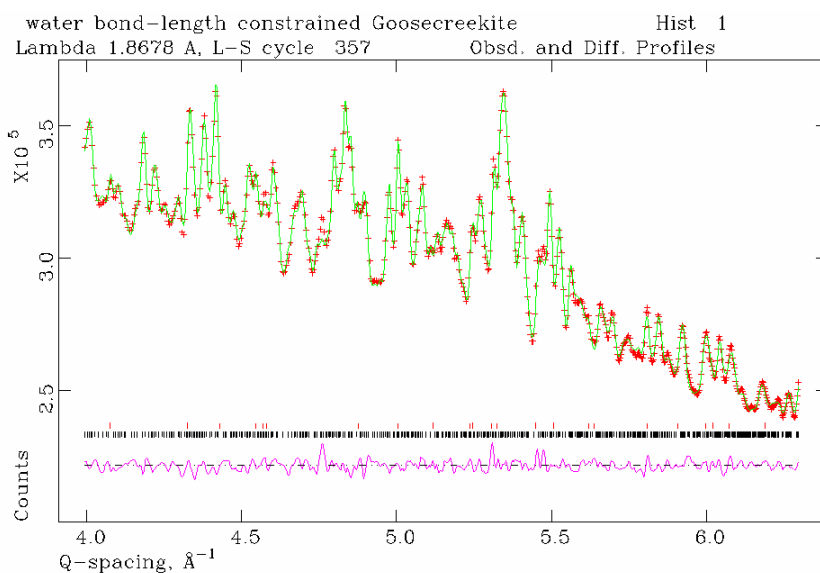

**Supplementary Figure 2** High Q region of the Rietveld fit shown in SF1.

**Supplementary Table 1** Atomic coordinates for the constrained water bond-length model for goosecreekite. Space group  $P 2_1$ .  $a = 7.43605(22)\text{\AA}$ ,  $b = 17.3988(5)\text{\AA}$ ,  $c = 7.29555(21)\text{\AA}$ ,  $\beta = 105.594(3)^\circ$

| Atom | X          | Y          | Z           | U <sub>i</sub> /U <sub>e</sub> *100 / $\text{\AA}^2$ | Occupancy |
|------|------------|------------|-------------|------------------------------------------------------|-----------|
| SI1  | 0.3328(9)  | 0.4735(4)  | 0.6296(10)  | 1.27(13)                                             | 1.0       |
| SI2  | 0.3167(10) | 0.1309(4)  | 0.6046(11)  | 1.27(13)                                             | 1.0       |
| SI3  | 0.0227(9)  | 0.2616(4)  | 0.5187(10)  | 1.27(13)                                             | 1.0       |
| SI4  | 0.1027(9)  | 0.0575(4)  | 0.8613(9)   | 1.27(13)                                             | 1.0       |
| SI5  | 0.0947(10) | 0.3835(4)  | 0.8348(10)  | 1.27(13)                                             | 1.0       |
| SI6  | 0.2401(10) | 0.0021(4)  | 0.2777(10)  | 1.27(13)                                             | 1.0       |
| AL7  | 0.7485(10) | 0.1302(4)  | 0.5913(10)  | 2.38(30)                                             | 1.0       |
| AL8  | 0.0675(10) | 0.3989(4)  | 0.2627(10)  | 2.38(30)                                             | 1.0       |
| O9   | 0.7185(14) | 0.0639(4)  | 0.4099(12)  | 1.03(4)                                              | 1.0       |
| O10  | 0.5377(10) | 0.1491(5)  | 0.6384(14)  | 1.03(4)                                              | 1.0       |
| O11  | 0.8379(11) | 0.2097(5)  | 0.5051(13)  | 1.03(4)                                              | 1.0       |
| O12  | 0.9021(10) | 0.1014(5)  | 0.8015(12)  | 1.03(4)                                              | 1.0       |
| O13  | 0.2574(12) | 0.4402(5)  | 0.8035(12)  | 1.03(4)                                              | 1.0       |
| O14  | 0.2644(11) | 0.4186(4)  | 0.4434(12)  | 1.03(4)                                              | 1.0       |
| O15  | 0.5580(9)  | 0.4626(5)  | 0.7056(12)  | 1.03(4)                                              | 1.0       |
| O16  | 0.1957(10) | 0.2057(5)  | 0.5091(13)  | 1.03(4)                                              | 1.0       |
| O17  | 0.2667(13) | 0.1037(5)  | 0.7983(13)  | 1.03(4)                                              | 1.0       |
| O18  | 0.2563(12) | 0.0589(5)  | 0.4583(11)  | 1.03(4)                                              | 1.0       |
| O19  | 0.0814(15) | 0.3007(5)  | 0.7290(11)  | 1.03(4)                                              | 1.0       |
| O20  | 0.9692(12) | 0.3187(5)  | 0.3350(14)  | 1.03(4)                                              | 1.0       |
| O21  | 0.9009(12) | 0.4703(4)  | 0.2210(13)  | 1.03(4)                                              | 1.0       |
| O22  | 0.1730(12) | 0.0580(5)  | 0.0929(9)   | 1.03(4)                                              | 1.0       |
| O23  | 0.1237(13) | 0.3681(5)  | 0.0606(9)   | 1.03(4)                                              | 1.0       |
| O24  | 0.9043(11) | 0.4307(5)  | 0.7398(14)  | 1.03(4)                                              | 1.0       |
| CA25 | 0.6593(18) | 0.2717(9)  | 0.1951(18)  | 2.49(33)                                             | 1.0       |
| OW1  | 0.3486(17) | 0.2214(7)  | 0.0894(17)  | 5.06(29)                                             | 1.0       |
| H1W1 | 0.2344(22) | 0.2542(11) | 0.0645(29)  | 5.06(29)                                             | 1.0       |
| H2W1 | 0.3340(36) | 0.1815(9)  | -0.0117(23) | 5.06(29)                                             | 1.0       |
| OW2  | 0.6344(20) | 0.2977(6)  | 0.8788(15)  | 5.29(33)                                             | 1.0       |
| H1W2 | 0.3640(33) | 0.8428(9)  | 0.2056(24)  | 5.29(33)                                             | 1.0       |
| H2W2 | 0.6202(29) | 0.2630(11) | 0.7667(23)  | 5.29(33)                                             | 1.0       |
| OW3  | 0.7582(17) | 0.1517(6)  | 0.1028(14)  | 2.69(22)                                             | 1.0       |
| H1W3 | 0.7977(26) | 0.1303(9)  | -0.0071(20) | 2.69(22)                                             | 1.0       |
| H2W3 | 0.7628(24) | 0.1073(8)  | 0.1908(20)  | 2.69(22)                                             | 1.0       |
| OW4  | 0.5685(16) | 0.4013(6)  | 0.1625(19)  | 5.17(28)                                             | 1.0       |
| H1W4 | 0.6767(24) | 0.4376(10) | 0.1989(34)  | 5.17(28)                                             | 1.0       |
| H2W4 | 0.4580(22) | 0.4241(11) | 0.0689(24)  | 5.17(28)                                             | 1.0       |
| OW5  | 0.5157(15) | 0.3012(6)  | 0.4597(19)  | 4.72(27)                                             | 1.0       |
| H1W5 | 0.4534(27) | 0.3527(8)  | 0.4432(28)  | 4.72(27)                                             | 1.0       |
| H2W5 | 0.4300(23) | 0.2605(9)  | 0.4839(29)  | 4.72(27)                                             | 1.0       |

## 2. Unconstrained bond-length model Rietveld

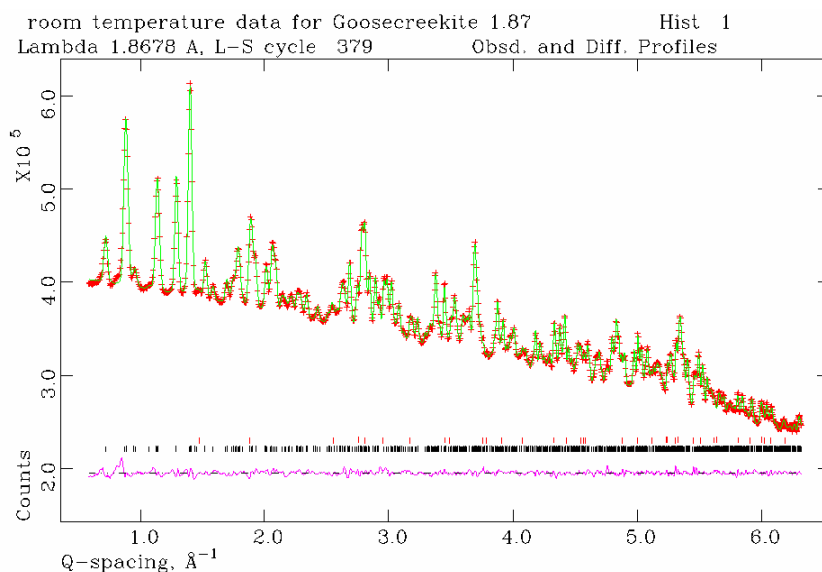

**Supplementary Figure 3** Final Rietveld refinement profile for goosecreekite for the unconstrained bond length model. The observed data are crosses, the calculated pattern a solid line, the tick marks show the allowed reflections (upper quartz, lower goosecreekite) and the lower solid line is the difference plot;  $R_{wp} = 6.4\%$ ,  $R_p = 4.8\%$  and  $R_{p**2} = 2.93\%$  for 1091 observations.

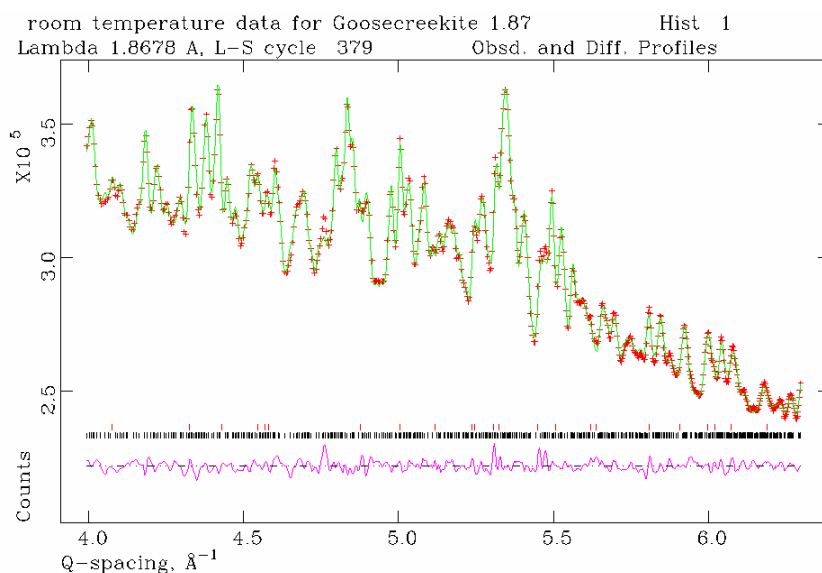

**Supplementary Figure 4** High Q region of the Rietveld fit.

**Supplementary Table 2** Atomic coordinates for the unconstrained water bond-length model for goosecreekite. Space group  $P 2_1$ .  $a = 7.43680(31) \text{ \AA}$ ,  $b = 17.3957(7) \text{ \AA}$ ,  $c = 7.29571(30) \text{ \AA}$ ,  $\beta = 105.591(3)^\circ$ .

| Atom | x          | y          | z          | U <sub>i</sub> /U <sub>e</sub> *100 / $\text{\AA}^2$ | Occupancy |
|------|------------|------------|------------|------------------------------------------------------|-----------|
| SI1  | 0.3384(13) | 0.4753(5)  | 0.6319(13) | 1.49(20)                                             | 1.0       |
| SI2  | 0.3167(14) | 0.1315(5)  | 0.6126(13) | 1.49(20)                                             | 1.0       |
| SI3  | 0.0239(13) | 0.2627(6)  | 0.5155(14) | 1.49(20)                                             | 1.0       |
| SI4  | 0.1011(13) | 0.0591(6)  | 0.8721(13) | 1.49(20)                                             | 1.0       |
| SI5  | 0.1048(14) | 0.3818(5)  | 0.8327(13) | 1.49(20)                                             | 1.0       |
| SI6  | 0.2350(13) | 0.0017(5)  | 0.2842(14) | 1.49(20)                                             | 1.0       |
| AL7  | 0.7450(15) | 0.1322(6)  | 0.5908(14) | 2.6(4)                                               | 1.0       |
| AL8  | 0.0657(13) | 0.4014(5)  | 0.2610(14) | 2.6(4)                                               | 1.0       |
| O9   | 0.7136(18) | 0.0657(6)  | 0.4094(16) | 0.84(6)                                              | 1.0       |
| O10  | 0.5366(14) | 0.1525(7)  | 0.6424(19) | 0.84(6)                                              | 1.0       |
| O11  | 0.8414(16) | 0.2094(6)  | 0.5032(17) | 0.84(6)                                              | 1.0       |
| O12  | 0.8980(14) | 0.1007(7)  | 0.7987(17) | 0.84(6)                                              | 1.0       |
| O13  | 0.2517(16) | 0.4469(7)  | 0.8032(16) | 0.84(6)                                              | 1.0       |
| O14  | 0.2614(16) | 0.4225(6)  | 0.4425(15) | 0.84(6)                                              | 1.0       |
| O15  | 0.5637(12) | 0.4613(8)  | 0.7006(16) | 0.84(6)                                              | 1.0       |
| O16  | 0.1946(13) | 0.2049(7)  | 0.5093(18) | 0.84(6)                                              | 1.0       |
| O17  | 0.2707(16) | 0.1002(6)  | 0.8057(16) | 0.84(6)                                              | 1.0       |
| O18  | 0.2564(15) | 0.0606(7)  | 0.4624(14) | 0.84(6)                                              | 1.0       |
| O19  | 0.0719(21) | 0.2983(6)  | 0.7293(15) | 0.84(6)                                              | 1.0       |
| O20  | 0.9711(16) | 0.3199(6)  | 0.3322(20) | 0.84(6)                                              | 1.0       |
| O21  | 0.8977(16) | 0.4724(5)  | 0.2133(18) | 0.84(6)                                              | 1.0       |
| O22  | 0.1726(16) | 0.0605(7)  | 0.1041(13) | 0.84(6)                                              | 1.0       |
| O23  | 0.1238(18) | 0.3707(7)  | 0.0592(12) | 0.84(6)                                              | 1.0       |
| O24  | 0.9178(16) | 0.4326(7)  | 0.7456(18) | 0.84(6)                                              | 1.0       |
| CA25 | 0.6648(32) | 0.2691(15) | 0.1867(32) | 5.2(6)                                               | 1.0       |
| OW1  | 0.3414(29) | 0.2250(11) | 0.0797(26) | 3.45(34)                                             | 1.0       |
| H1W1 | 0.2465(42) | 0.2481(15) | 0.0724(38) | 3.45(34)                                             | 1.0       |
| H2W1 | 0.3147(43) | 0.1807(17) | 0.0091(41) | 3.45(34)                                             | 1.0       |
| OW2  | 0.6281(26) | 0.2983(13) | 0.8635(26) | 4.15(41)                                             | 1.0       |
| H1W2 | 0.3737(48) | 0.8445(19) | 0.1863(41) | 4.15(41)                                             | 1.0       |
| H2W2 | 0.6296(37) | 0.2577(17) | 0.7723(44) | 4.15(41)                                             | 1.0       |
| OW3  | 0.7551(23) | 0.1517(9)  | 0.0996(24) | 2.09(29)                                             | 1.0       |
| H1W3 | 0.7768(35) | 0.1312(14) | 0.0114(39) | 2.09(29)                                             | 1.0       |
| H2W3 | 0.7769(31) | 0.1036(15) | 0.1887(34) | 2.09(29)                                             | 1.0       |
| OW4  | 0.5599(30) | 0.4033(10) | 0.1568(28) | 4.10(36)                                             | 1.0       |
| H1W4 | 0.6762(38) | 0.4419(15) | 0.2028(42) | 4.10(36)                                             | 1.0       |
| H2W4 | 0.4714(41) | 0.4112(16) | 0.0687(39) | 4.10(36)                                             | 1.0       |
| OW5  | 0.5151(31) | 0.2990(12) | 0.4526(29) | 6.06(46)                                             | 1.0       |
| H1W5 | 0.4497(47) | 0.3538(17) | 0.4532(44) | 6.06(46)                                             | 1.0       |
| H2W5 | 0.4126(40) | 0.2619(17) | 0.4921(44) | 6.06(46)                                             | 1.0       |

**Supplementary Table 3** Relevant bond distances in unconstrained goosecreekite illustrating the calcium coordination sphere and the H-bonding to the framework.

| Bond      | Distance / Å | Bond     | Distance / Å |
|-----------|--------------|----------|--------------|
| Ca-O11    | 2.544(14)    | O17-H2W1 | 2.015(26)    |
| Ca-O20    | 2.401(14)    | O15-H1W2 | 2.141(27)    |
| Ca-OW1    | 2.474(20)    | O10-H2W2 | 2.296(26)    |
| Ca-OW2    | 2.307(18)    | H2W2-OW5 | -#           |
| Ca-OW3    | 2.451(17)    | O12-H1W3 | 1.967(23)    |
| Ca-OW4    | 2.327(20)    | O9-H2W3  | 1.878(21)    |
| Ca-OW5    | 2.497(18)    | O21-H1W4 | 1.679(25)    |
| Ave Si-O* | 1.625(4)     | O13-H2W4 | 2.146(23)    |
| Ave Al-O* | 1.725(3)     | O14-H1W5 | 1.796(26)    |
| Ave O-H*  | See Table 4  | O16-H2W5 | 2.077(26)    |
| O23-H1W1  | 2.248(26)    | O10-H2W5 | 2.271(25)    |

\*constrained bond lengths.

#No value is recorded for this bond length as it is now greater than 2.3 Å.

**Supplementary Table 4** Relevant bond angles in the water molecules in the unconstrained model of goosecreekite.

| Bond          | Angle / ° | Bond          | Angle / ° |
|---------------|-----------|---------------|-----------|
| H1W1-OW1-H2W1 | 117.3(20) | H1W4-OW4-H2W4 | 114.3(21) |
| H1W2-OW2-H2W2 | 90.7(18)  | H1W5-OW5-H2W5 | 112.0(21) |
| H1W3-OW3-H2W3 | 109.4(16) |               |           |

**Supplementary Table 5** Water bond lengths in the unconstrained model of goosecreekite.

| Bond     | Distance / Å | Bond     | Distance / Å |
|----------|--------------|----------|--------------|
| H1W1-OW1 | 0.854(33)    | H2W1-OW1 | 0.819(33)    |
| H1W2-OW2 | 1.105(32)    | H2W2-OW2 | 0.879(33)    |
| H1W3-OW3 | 0.834(25)    | H2W3-OW3 | 0.981(25)    |
| H1W4-OW4 | 1.089(30)    | H2W4-OW4 | 0.917(33)    |
| H1W5-OW5 | 1.000(32)    | H2W5-OW5 | 0.967(32)    |

In order to model the background for the refinements, a manual background was chosen and left fixed, fitted with 6 terms of a type 1 (shifted Chebyshev) background profile until the final cycles of the refinement when it was allowed to vary normally. The reason for this was to minimise the correlation between the ADPs and the background at higher values of Q where peak overlap becomes more significant.

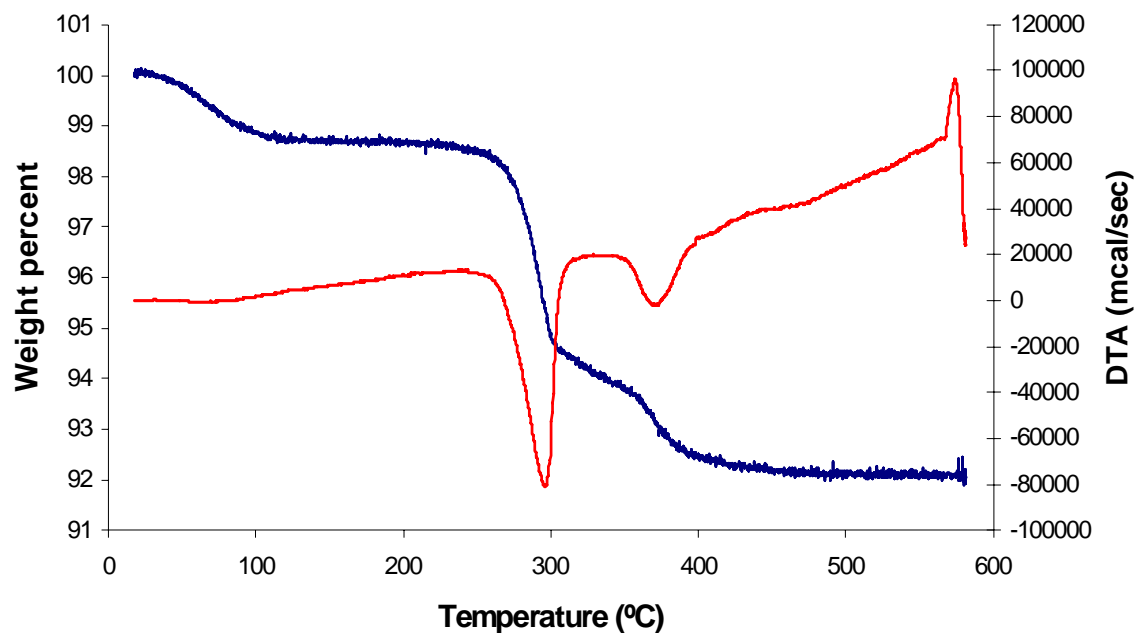

**Supplementary Figure 5** TGA/DTA plot of the dehydration of Goosecreekite, performed on a 15mg sample, referenced to an alumina standard. The heating rate used was 10 °C / min.
